# Supplementary material for: A novel fluorescent off–on probe based on 4-methylumbelliferone for highly sensitive determination of tyrosinase
Source: Royal Society of Chemistry journal article supplement (doi:10.1039/d2nj00799a), 2022-01-01
Supplement: d2nj00799a1.pdf [file d2nj00799a1.pdf]

## Supporting Information

### **A novel fluorescent off-on probe based on 4-methylumbelliferone for highly sensitive determination of tyrosinase**

Yu Ding, Lihong Yang, Jiwei Shen, Yinmao Wei, Chaozhan Wang\*

*Key Laboratory of Synthetic and Natural Functional Molecule of the Ministry of  
Education, College of Chemistry and Materials Science, Northwest University, Xi'an  
710127, China*

\* Corresponding authors: College of Chemistry and Materials Science, Northwest University, 1 Xue Fu Avenue, Chang'an District, Xi'an 710127, P R China. Tel/Fax: +86-29-81535026, Email: [czwang@nwu.edu.cn](mailto:czwang@nwu.edu.cn) (Chaozhan Wang).

To be published in *New Journal of Chemistry*

# 1. NMR and HRMS Spectra

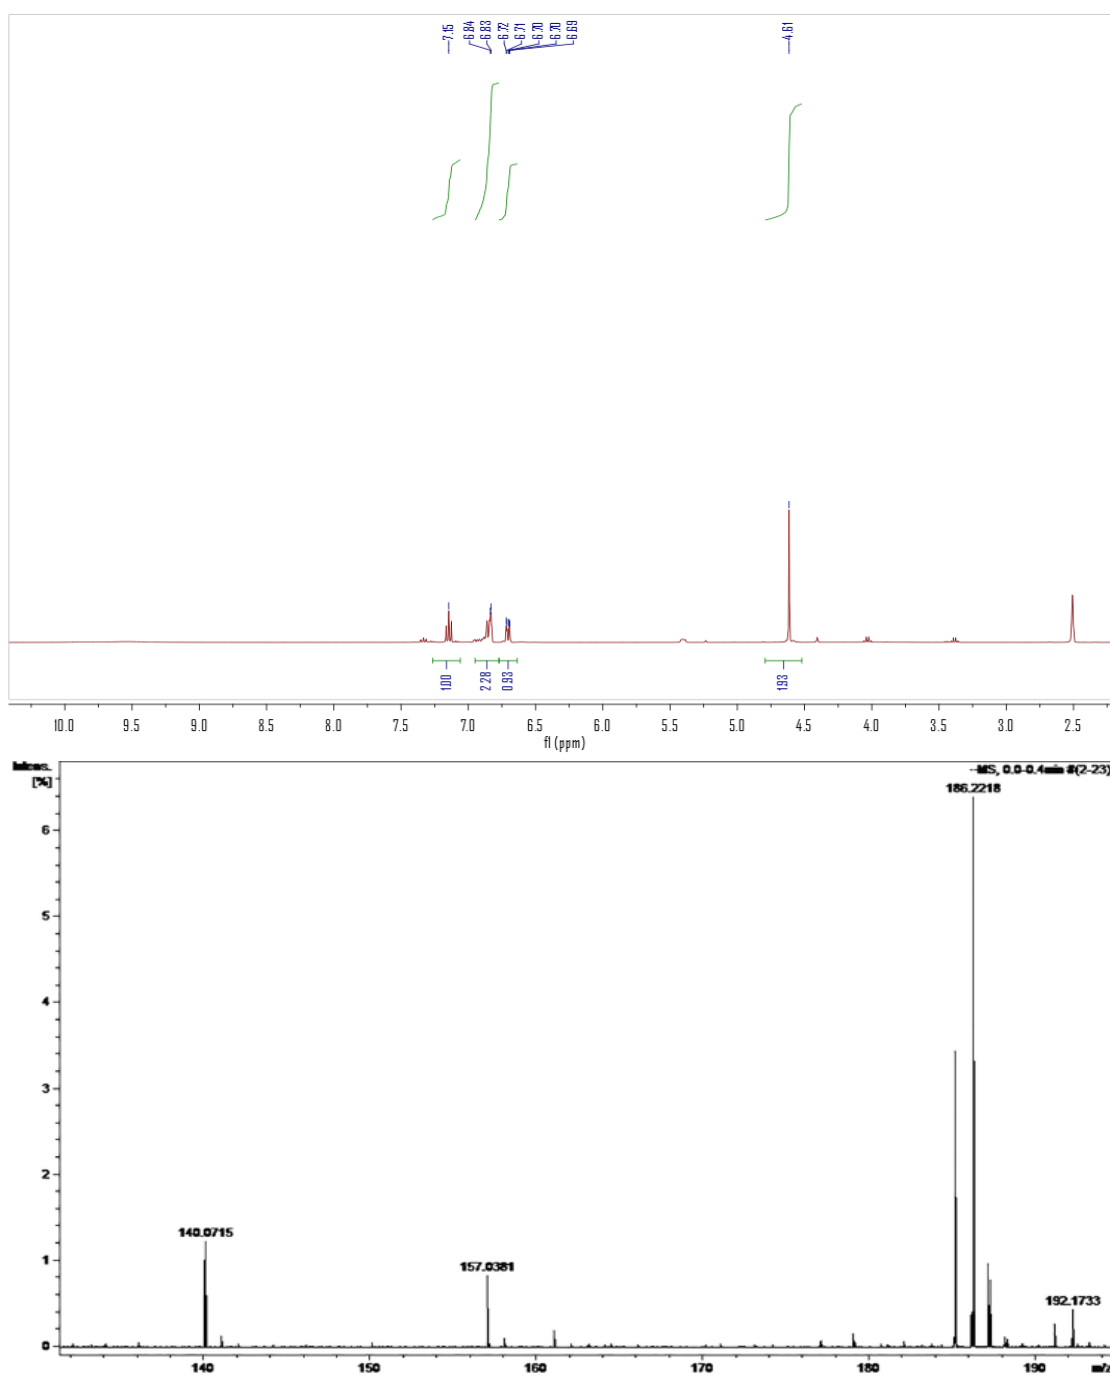

Fig. S1  $^1\text{H NMR}$  and HRMS Spectra of 3-bromomethylphenol.

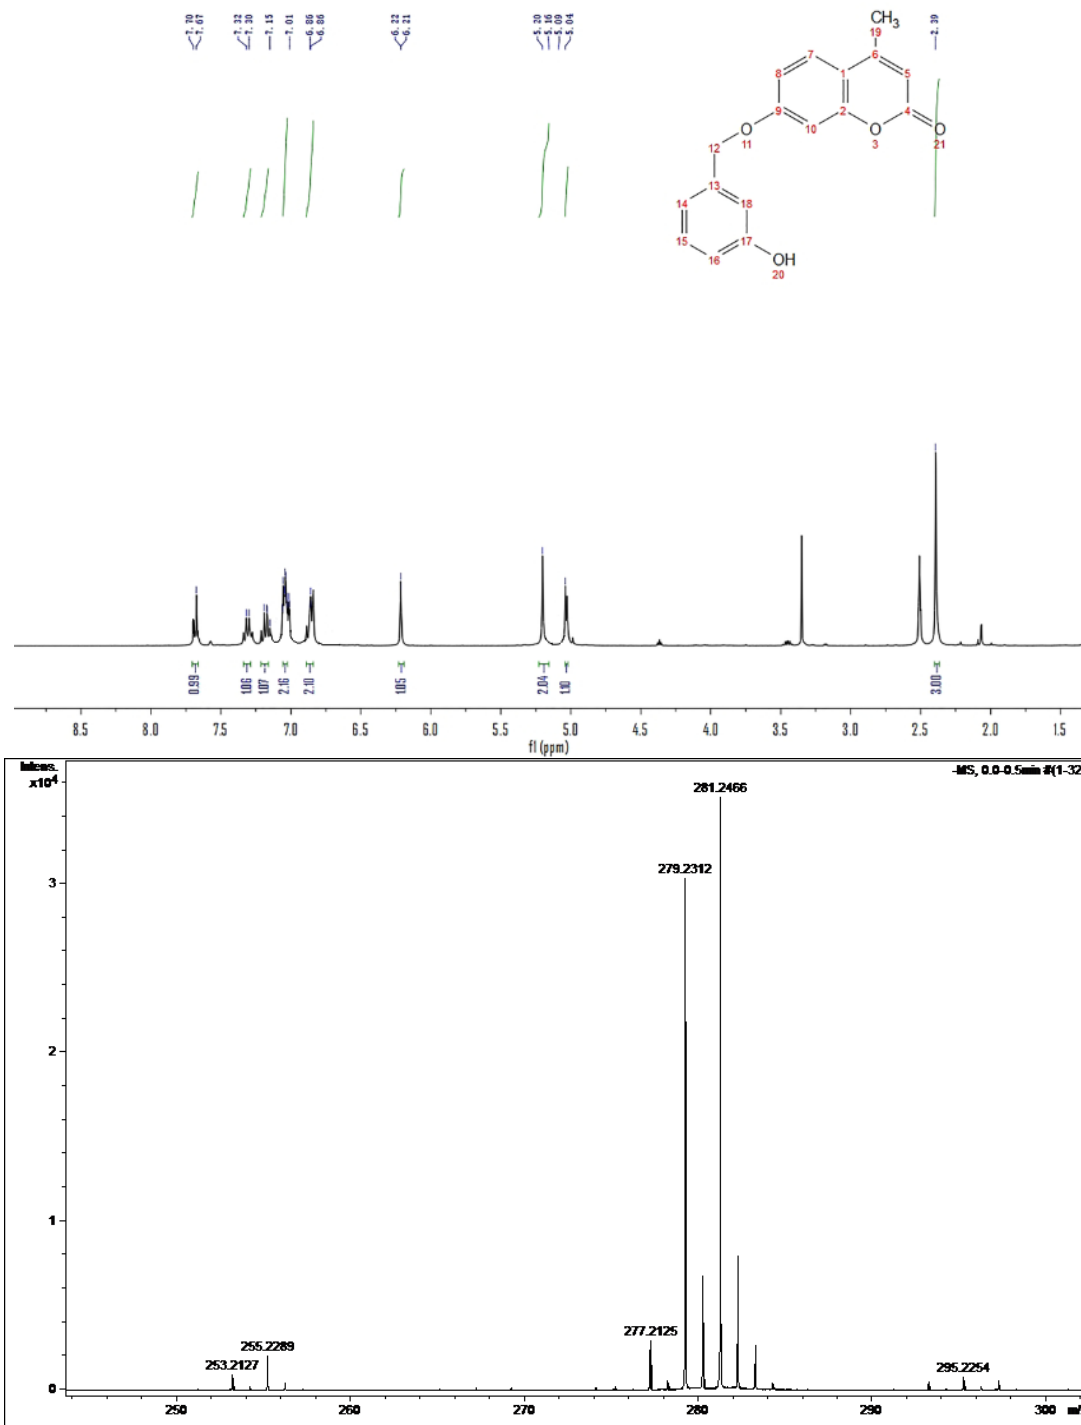

Fig. S2 <sup>1</sup>H NMR and HRMS Spectra of probe MU.

## 2. Determination of fluorescence quantum yield

Fluorescence quantum yield ( $\Phi$ ) was determined by using quinine sulfate ( $\Phi = 0.54$  in 0.1 M H<sub>2</sub>SO<sub>4</sub> solution) as a standard[1].

$$\phi = \frac{\phi_r I A_r \eta}{I_r A \eta_r}$$

$\phi$  is the quantum yield; I is the integrated area under the emission spectrum; A is the absorbance at the absorption peak;  $\eta$  is the refractive index of the solvent used; subscript r is the standard.

## 3. HPLC and HRMS spectra of MU + Tyr

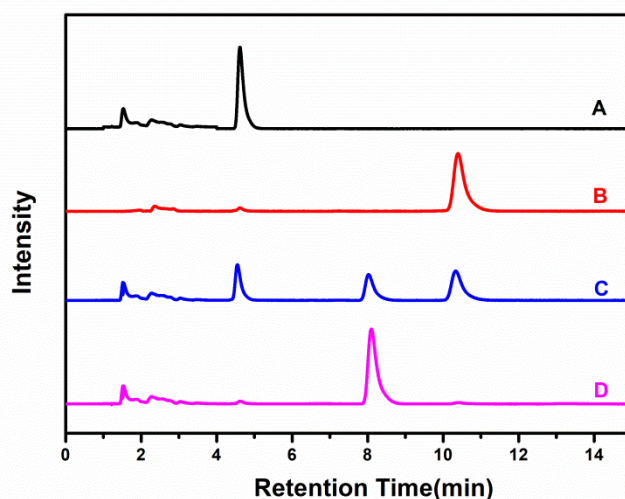

**Fig. S3** Chromatograms of different species. 4-methylumbelliferone (200  $\mu$ M) (A), probe MU (200  $\mu$ M) (B), probe MU (200  $\mu$ M) + TYR (500 U $\cdot$ mL<sup>-1</sup>) (C), 3-hydroxybenzyl alcohol (200  $\mu$ M) (D). Chromatographic conditions: the detection wavelength was set at 320 nm, the flow rate was set at 1.0 mL $\cdot$ min<sup>-1</sup>, the mobile phase is acetonitrile: ammonium formate (25 mM) (1:1), and all the chromatographic runs were carried out at 25  $^{\circ}$ C.

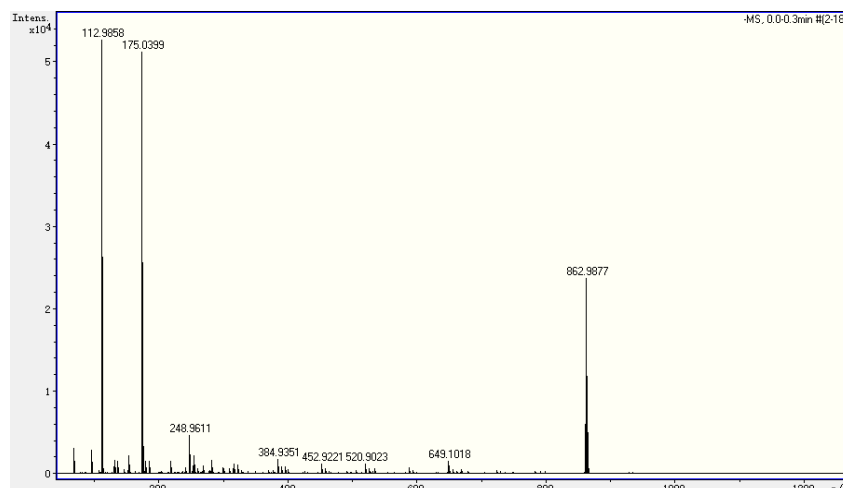

**Fig. S4** HRMS Spectra of the reaction solution of the probe MU and TYR.

#### 4. Optimization of the experimental conditions

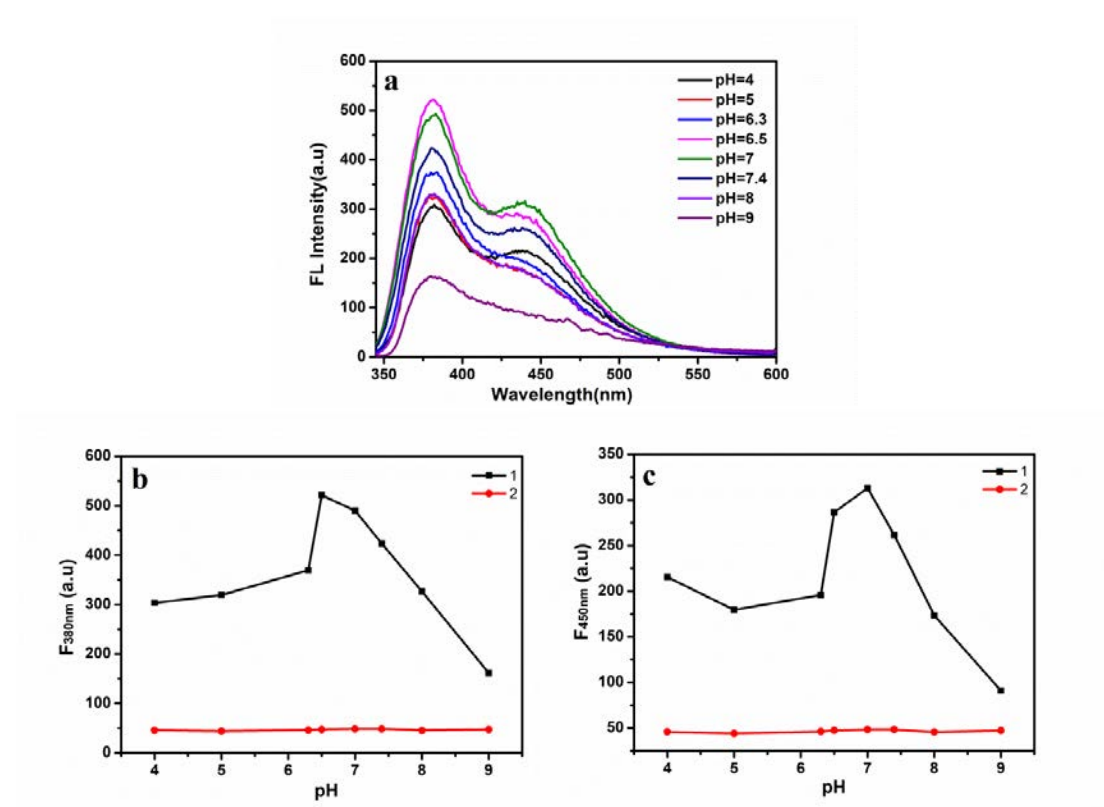

**Fig. S5** Effect of pH, (a) fluorescence spectra of the probe MU response to TYR at different pH, (b) the relationship between the fluorescence intensity at 380 nm and pH, (c) the relationship between the fluorescence intensity at 450 nm and pH. Curve 1 is the fluorescent probe MU and enzyme response, curve 2 is the fluorescent probe MU.

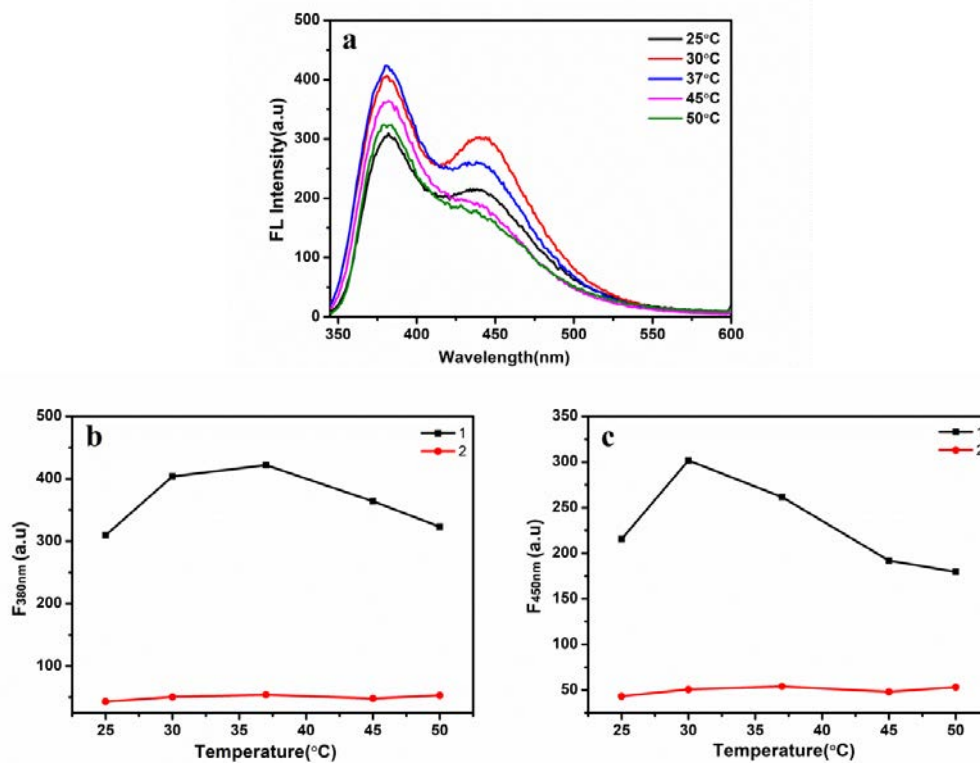

**Fig. S6** The influence of incubation temperature on the fluorescence detection system, (a) Fluorescence spectra of the probe MU response to TYR at different incubation temperatures, (b) the relationship between the fluorescence intensity at 380 nm and the incubation temperature, (c) the relationship between the fluorescence intensity at 450 nm and the incubation temperature, Curve 1 is the fluorescent probe MU and enzyme response, curve 2 is the fluorescent probe MU.

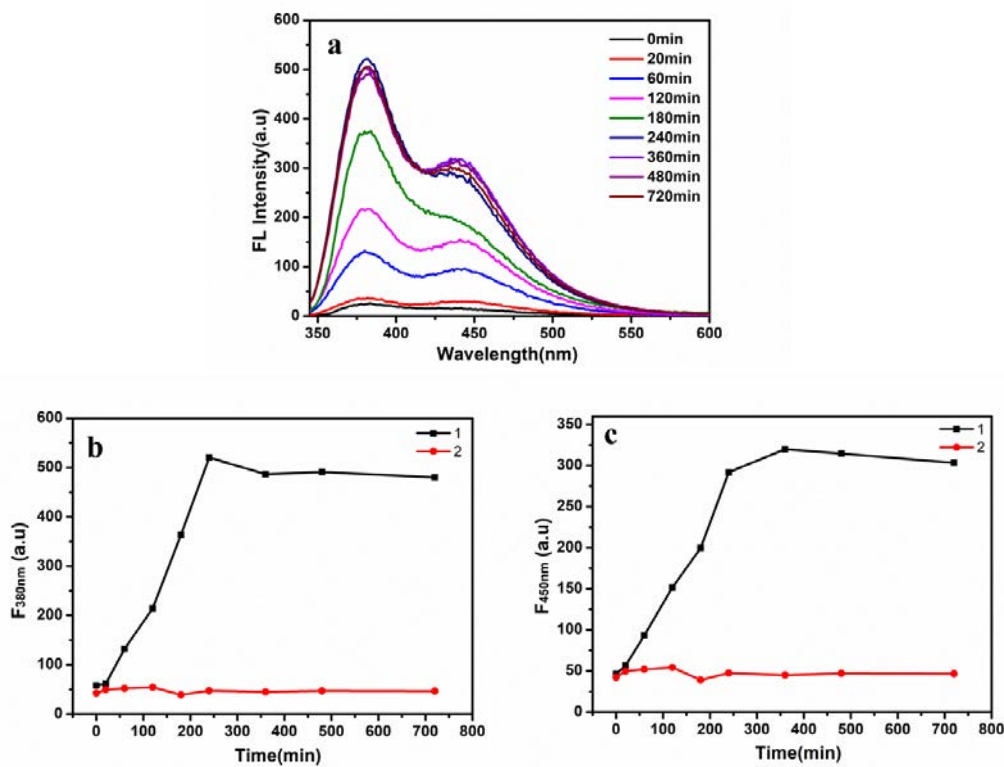

**Fig. S7** The effect of incubation time on the fluorescence intensity of the reaction system, (a) Fluorescence spectra of the probe response to TYR under different incubation times, (b) the relationship between the fluorescence intensity at 380 nm and the incubation time, and (c) the relationship between the fluorescence intensity at 450 nm and the incubation time. Curve 1 is the fluorescent probe MU and enzyme response, 2 is the fluorescent probe MU.

## 5. Comparison of the performance of TYR probes

**Table S1** Recent reports about TYR probes.

| Fluorescent probe                                                                   | Experimental conditions | Linear range (U·mL <sup>-1</sup> ) | LOD (U·mL <sup>-1</sup> ) | References |
|-------------------------------------------------------------------------------------|-------------------------|------------------------------------|---------------------------|------------|
| 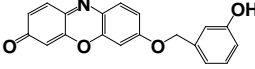   | 37 °C, 3 h, pH=7.4      | 1-90                               | 2.76                      | [2]        |
|    | 37 °C, 5 h, pH=7.4      | 1-100                              | 0.5                       | [3]        |
|    | 37 °C, 5 h, pH=7.4      | 0-45                               | 0.127                     | [4]        |
|    | 37 °C, 0.5 h, pH=7.4    | 0-1                                | -                         | [5]        |
|   | 37 °C, 3 h, pH=7.4      | 0.5-100                            | 0.6                       | [6]        |
|  | 37 °C, 4 h, pH=7.4      | -                                  | -                         | [1]        |
|  | 37 °C, 3 h, pH=7.4      | 0-190                              | 0.06                      | [7]        |
|  | 37 °C, 2.5 h, pH=7.4    | 2-8                                | 0.36                      | [8]        |
|  | 37 °C, 4 h, pH=6.5      | 0.4-80                             | 0.2                       | This work  |



## 6. Kinetic experiments

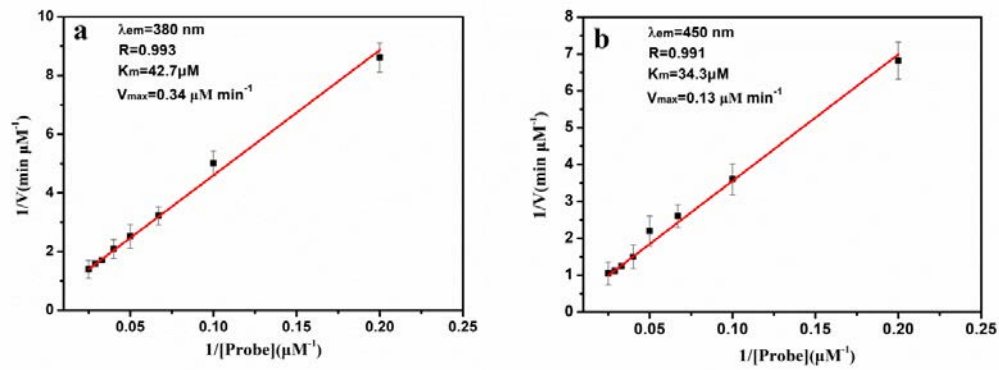

**Fig. S8** Lineweaver-Burk diagram of the enzymatic reaction at the emission peaks of 380 nm (a) and 450 nm (b), in the equation:  $V = V_{max} [\text{probe}] / (K_m + [\text{probe}])$ , where  $V$  is the reaction rate,  $[\text{probe}]$  is the probe concentration,  $K_m$  is the Michaelis constant. Measurement conditions: TYR concentration:  $20 \text{ U}\cdot\text{mL}^{-1}$ , the probe MU concentration:  $5\text{-}40 \mu\text{M}$ , the reaction of each probe concentration is repeated three times, and the error bar represents the standard deviation.

## References

- 1 C. Y. Zhan, F. Zeng, S. Z. Wu, J. T Cheng, B. Li, S. L. Huang, F. Zeng and S. Z. Wu, *Anal. Chem.*, 2018, **90**, 8807–8815.
- 2 X. F. Wu, X. H. Li, H. Y. Li, W. Shi and H. M. Ma, *Chem. Commun.*, 2017, **53**, 2443–2446.
- 3 H. H. Li, W. Liu, F. Y. Zhang, X. Y. Zhu, L. Q. Huang and H. X. Zhang, *Anal. Chem.*, 2018, **90**, 855–858.
- 4 S. S. Hu, T. L. Wang, J. J. Zou, Z. Zhou, C. F. Lu, J. Q. Nie, C. Ma, G. C. Yang, Z. X. Chen, Y. X. Zhang, Q. Su, Q. Fei, J. Ren and F. Y. Wang, *Sens. Actuators B Chem.*, 2019, **283**, 873–880.
- 5 Z. P. Li, Y. F. Wang, C. C. Zeng, L. M. Hu and X. J. Liang, *Anal. Chem.*, 2018, **90**, 3666–3669.
- 6 Q. Li, C. X. Yan, J. Zhang, Z. Q. Guo and W. H. Zhu, *Dyes Pigm.*, 2019, **162**, 802–807.
- 7 S. Yang, J. X. Jiang, A. X. Zhou, Y. B. Zhou, W. L. Ye, D. S. Cao and R. H. Yang, *Anal. Chem.*, 2020, **92**, 7194–7199.
- 8 N. Ding, H. Xu, S. Zong, Y. B. Gong, Y. T. Hao, X. J. Tang and Z. Li, *J. Agric. Food Chem.*, 2021, **69**, 1994–2000.
